# Supplementary material
Source: publisher site journal article supplement (https://www.dovepress.com/article/424522)
Supplement: Supplementary file 1 [file get_supplementary_file.php]

**English version Questionnaire that used to assess the proportion of ocular protection practice and associated factors among welders in Gondar city, Northwest Ethiopia**

| 1. **Socio-Demographic Data** | | | |
| --- | --- | --- | --- |
| **Serial No** | **Question** | **Response** | **Remark** |
|  | Age (years) |  |  |
|  | Sex | 1. Male 2. Female |  |
|  | Educational status | 1. Primary school 2. Secondary school 3. College and above |  |
|  | Current marital status | 1. Single 2. Married 3. Divorced 4. Widowed |  |
|  | Monthly Income (ETB) | ………………………….. |  |
| 1. **Job-related factors and Personal protective eyewear** | | | |
|  | What type of welding you do? | 1. Arc welding 2. Gas welding 3. Arc and gas welding |  |
|  | Do you have job training? | 1. Yes 2. No |  |
|  | How many hours do you work per day? | __________ hours |  |
|  | How many years you been working? | __________ years |  |
|  | Have you easily accessed personal protective eyewear? | 1. Yes 2. No |  |
|  | How to you rate the cost of personal protective eyewear? | 1. Cheap 2. Fair 3. Expensive |  |
|  | Do you have history of ocular trauma in the last 1 year’s duration? | 1. Yes 2. No |  |
| 1. **Attitude on personal protective eyewear (PPEW)** | | | |
|  | Would you use personal protective eyewear if available? | 1. Yes 2. No |  |
|  | Do you think protecting eye is necessary at work? | 1. Yes 2. No |  |
|  | Do you think personal protective eyewear is effective in terms of injury protection? | 1. Yes 2. No |  |
|  | Do you think you should not continue working if you lack personal protective eyewear? | 1. Strong agree 2. Agree 3. Neutral 4. Disagree 5. Strong disagree |  |
|  | Do you think workers need to be trained of using personal protective eyewear? | 1. Strong agree 2. Agree 3. Neutral 4. Disagree 5. Strong disagree |  |
|  | Can you use personal protective eyewear without supervision? | 1. Yes 2. No |  |
| 1. **Knowledge about personal protective eyewear** | | | |
|  | Is personal protective eyewear offers ocular protection? | 1. Yes 2. No |  |
|  | Have you considered presence hazard when using personal protective eyewear? | 1. Yes 2. No |  |
|  | Is each task needs different type of personal protective eyewear? | 1. Yes 2. No |  |
|  | Are all types of personal protective eyewear provide the same level of ocular protection? | 1. Yes 2. No |  |
| 1. **Ocular practice related questions** | | | |
|  | Do you use the personal protective eyewear? | 1. **Yes**  2. No | No (skip to “Q” 505) |
|  | In what frequency you used personal protective eyewear? | 1. **Always** 2. Sometimes |  |
|  | If yes, which personal protective eyewear you used? | 1. Sunglass 2. Face shield 3. Helmet 4. Googles 5. Sunglass and face shield 6. Goggles and face shield 7. Others __________ |  |
|  | Have you exposed without personal protective eyewear nearby welders? | 1. Yes **2. No** |  |
|  | Do you experience foreign body sensation during working operation? | 1. Yes **2. No** |  |
|  | Do you experience eye symptoms during or after work? | 1. Yes **2. No** |  |
|  | Do you have notice after-image (like after camera flash) during welding? | 1. Yes **2. No** |  |

| 1. **Standardize Observational check lists, mark (**✔**)** | | | | |
| --- | --- | --- | --- | --- |
|  | Personal Protective eyewear (PPEW) | Yes | No | Comments |
| 1. . | PPEW used at the time of data collection   - Welders who wear prescription eyewear could be wear either prescription safety glasses or safety goggles over their prescription glasses. | ✔ |  |  |
| 509. | Is personal protective eyewear meet the international standards (known by ESA)?  Check  AZSI Z87.1  AS/NZS 1338.1 Australian standard  EN169, 2002: (European standard)  GB/T 3609.1/2(china standard)  CSA Standard Z94.3(Canada)  CES 34 or 35, ES ISO 4850 :2013(Ethiopian standard) | ✔ |  |  |
| 510. | Handling, fitting of PPEW (snug on the bridge of the nose, with the temples adjusted to keep the center of the lens in front of the eye) | ✔ |  |  |
| 511. | There is no (break, scratch, dust, cracked or pitted and dirties) | ✔ |  |  |
